# Supplementary material
Source: publisher figshare collection journal article supplement (https://karger.figshare.com/ndownloader/files/5961600)
Supplement: Supplementary file 1 [file 5961600]

Table S7: Two mediator analysis, TAS-20/PDS = mediator, childhood abuse (dich.) = exposure, DES = dependent variable, sex, age = covariables, N=666. GSI is excluded from the model.

Childhood abuse

| Effect of TAS-20 accounted for PDS | Mean | CI |
| --- | --- | --- |
| ACME | 0.613 | (0.02, 1.23)* |
| Direct Effect | 2.552 | (0.86, 4.23)* |
| Total Effect | 3.164 | (1.40, 5.00)* |
| % of TME | 0.193 | (0.12, 0.44) |

Childhood abuse

| Effect of PDS accounted for TAS-20 | Mean | CI |
| --- | --- | --- |
| ACME | 1.480 | (0.78, 2.28)* |
| Direct Effect | 2.552 | (0.86, 4.23)* |
| Total Effect | 4.032 | (2.17, 5.88)* |
| % of TME | 0.366 | (0.25, 0.68) |

TE: Total Effect; TME: Total Mediated Effect; ACME: Average Causal Mediated Effect; CI: 95% Confidence interval, * p<0.05
